# Supplementary material for: Endothelial Cells Promote Expansion of Long‐Term Engrafting Marrow Hematopoietic Stem and Progenitor Cells in Primates
Source: PubMed Central journal article supplement (PMC5442761; doi:10.5966/sctm.2016-0240), 2016-10-14
Supplement: SCT3-6-0864-s001.pdf [file SCT3-6-0864-s001.pdf]

Gorie et al., Suppl. Figure S1

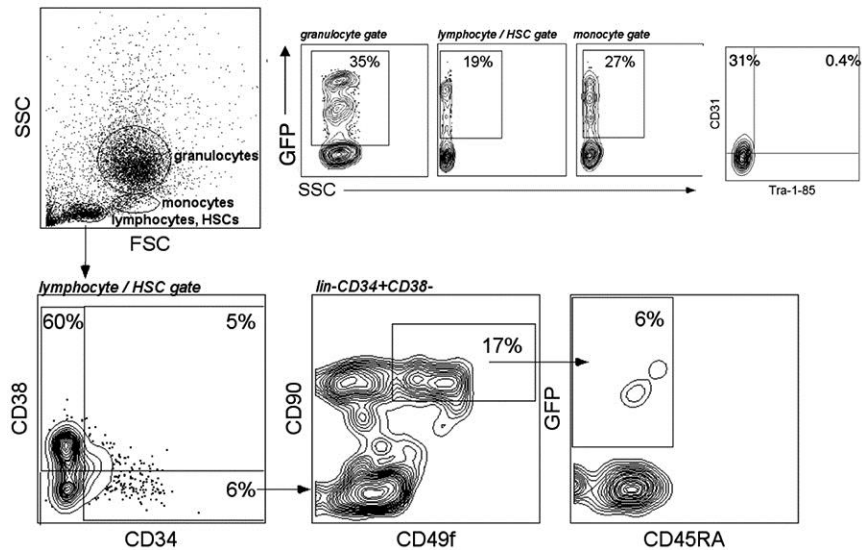

**Supplemental Figure S1. Detection of GFP<sup>+</sup> cells in the bone marrow 3 months after transplantation of EC-expanded lentivirus transduced CD34<sup>+</sup> cells (Animal A11224).**

Detection of GFP<sup>+</sup> cells by flow cytometry in granulocyte, monocyte and lymphocytes gates (based on FSC X SSC). *Far left:* Absence of human (Tra-185<sup>+</sup>) CD31<sup>+</sup> endothelial cells in the marrow. *Bottom:* Flow cytometry analysis of gene marking LT-HSPC like cells (CD34<sup>+</sup>CD90<sup>+</sup>CD49f<sup>+</sup>CD38<sup>-</sup>CD45RA<sup>-</sup>).

**Supplemental Table S1. Gene transfer, cell dose, and marking *in vivo* >300 days\* after transplantation of EC-expanded CD34<sup>+</sup> cells. %FL<sup>+</sup>: % fluorophore positive.**

| <i>Transplant details</i> |                         | <i>ex vivo analysis</i>                             |                                               | <i>in vivo analysis</i>             |                                    |                                           |                                            |
|---------------------------|-------------------------|-----------------------------------------------------|-----------------------------------------------|-------------------------------------|------------------------------------|-------------------------------------------|--------------------------------------------|
| <b>NHP ID</b>             | <b>Marrow source</b>    | <b>CD34<sup>+</sup> cell dose×10<sup>6</sup>/kg</b> | <b>%FL<sup>+</sup> CD34<sup>+</sup> cells</b> | <b>%FL<sup>+</sup> Granulocytes</b> | <b>%FL<sup>+</sup> Lymphocytes</b> | <b>%FL<sup>+</sup> of CD3<sup>+</sup></b> | <b>%FL<sup>+</sup> of CD20<sup>+</sup></b> |
| A11224                    | steady state (unprimed) | 20                                                  | 55                                            | 11                                  | 11                                 | 7                                         | 24                                         |
| A11208                    | steady state (unprimed) | 30                                                  | 60                                            | 17                                  | 27                                 | 28                                        | 39                                         |
| Z13018                    | steady state (unprimed) | 60                                                  | 52                                            | 43                                  | 34                                 | 30                                        | 35                                         |

After transplantation, all animals were treated with post transplantation immunosuppression for 180 days to prevent immune response to GFP (foreign protein). \*Analysis for A11208 was conducted at time of death due to malarial infection (100 days' post transplantation).
